# Supplementary material
Source: MDPI journal article supplement (https://www.mdpi.com/2077-0472/12/5/598)
Supplement: s1 [file s1]

**Table S1.** Primers used for real-time qPCR

| Genes  | Accession      | Sequences (5'-3')                                             | Amplicon size<br>(bp) | Annealing<br>temperature (Tm) |
|--------|----------------|---------------------------------------------------------------|-----------------------|-------------------------------|
| MAPK14 | NM_001079511.2 | F: AAGAACCTACAGGAAGTGC GGTTA<br>R: GTCACCAGGTACACATCATTGAATTC | 141                   | 56°C                          |
| IL1B   | NM_174093.1    | F: ATTCTCTCCAGCCAACCTTCATT<br>R: TTCTCGTCACTGTAGTAAGCCATCA    | 101                   | 56°C                          |
| IL6    | NM_173923.2    | F: CCAGAGAAAACCGAAGCTCTCAT<br>R: CCTTGCTGCTTTCACACTCATC       | 101                   | 56°C                          |
| TNFA   | NM_173966.3    | F: TCTCAAGCCTCAAGTAACAAGCC<br>R: CCATGAGGGCATTGGCATAAC        | 111                   | 56°C                          |
| COX2   | DQ347627.1     | F: GCTGACCCATACAAGCACGA<br>R: AAGATGATGGCGGGCAGAAT            | 72                    | 56°C                          |
| iNOS   | DQ676956.1     | F: GGACTTGGCTACGGAAGTGG<br>R: GCTCAGGGATTCTGGAGACG            | 169                   | 56°C                          |
| SOCS3  | NM_174466.2    | F: GTCACCCACAGCAAGTTTCC<br>R: ACGGTGCTCCAGTAAAAGCC            | 149                   | 56°C                          |
| GAPDH  | NM_001034034.2 | F: TTGTCTCCTGCGACTTCAACA<br>R: TCGTACCAGGAAATGAGCTTGAC        | 103                   | 56°C                          |
| UXT    | NM_001037471.2 | F: TGTGGCCCTTGGATATGGTT<br>R: GGTTGTCGCTGAGCTCTGTG            | 101                   | 55°C                          |
| RPS9   | NM_001101152.2 | F: CCTCGACCAAGAGCTGAAG<br>R: CCTCCAGACCTCACGTTTGTTT           | 64                    | 54°C                          |

The PCR reactions were carried out as the following: 95°C for 5 min followed by 40 cycles of 95°C for 10 s and 60°C for 30 s [11]. The PCR reaction system was 20 µL in total, the final concentration of each primer used was 10 µmol/L [48].
